# Supplementary material
Source: Springer Nature journal article supplement (https://www.springermedizin.de/resource/supplementary/12891_2013_1945_MOESM4_ESM.pdf/9508860)

Gamma (femoral component flexion)

CON

CAOS

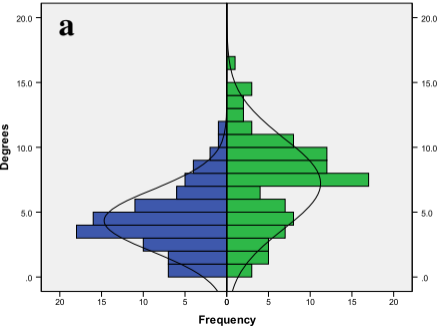

Sigma (tibial slope)

CON

CAOS

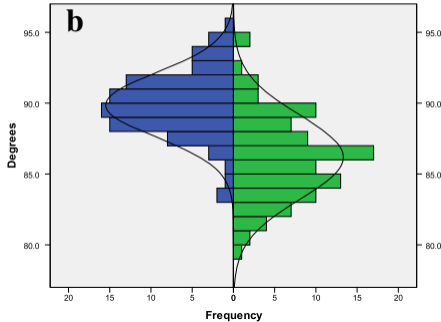

Supplement: MOESM4 [file 9508860]
